# Supplementary material
Source: publisher figshare collection journal article supplement (https://karger.figshare.com/ndownloader/files/35913392)
Supplement: Supplementary file 1 [file 35913392]

**Supplementary Figure Legend**

Supplementary Fig. 1. Representative images of the demarcation clear (DC) and demarcation unclear (DU) groups. The yellow dot-line represents the demarcation. The demarcation was unclear in the DU group.
